# Supplementary material for: Spatial protein expression of Panax ginseng by in-depth proteomic analysis for ginsenoside biosynthesis and transportation
Source: PubMed Central journal article supplement — J Ginseng Res. 2020 Apr 6;45(1):58–65. doi: 10.1016/j.jgr.2020.01.009 (PMC7790901; doi:10.1016/j.jgr.2020.01.009), 2020-04-06
Supplement: mmc1.pdf [file mmc1.pdf]

## Supporting Information

### Spatial Protein Expression of *Panax Ginseng* by In-depth Proteomic Analysis for Ginsenoside Biosynthesis and Transportation

Xiaoying Li<sup>a#</sup>, Xianhui Cheng<sup>a#</sup>, Baosheng Liao<sup>b</sup>, Jiang Xu<sup>b</sup>, Xu Han<sup>c</sup>, Jinbo  
Zhang<sup>d</sup>, Zhiwei Lin<sup>d</sup>, Lianghai Hu<sup>a\*</sup>

<sup>a</sup>Key Laboratory Molecular Enzymology and Engineering, the Ministry of Education, National Engineering Laboratory of AIDS Vaccine, School of Life Sciences, Jilin University, Changchun 130023, China

<sup>b</sup>Institute of Chinese Materia Medica, China Academy of Chinese Medical Sciences, Beijing, China

<sup>c</sup>Jilin Zixin Pharmaceutical Industrial CO. LTD.

<sup>d</sup>Nanjing Novogene Biotechnology CO. LTD.

<sup>#</sup>contribute equally

\*E-mail:lianghaihu@jlu.edu.cn

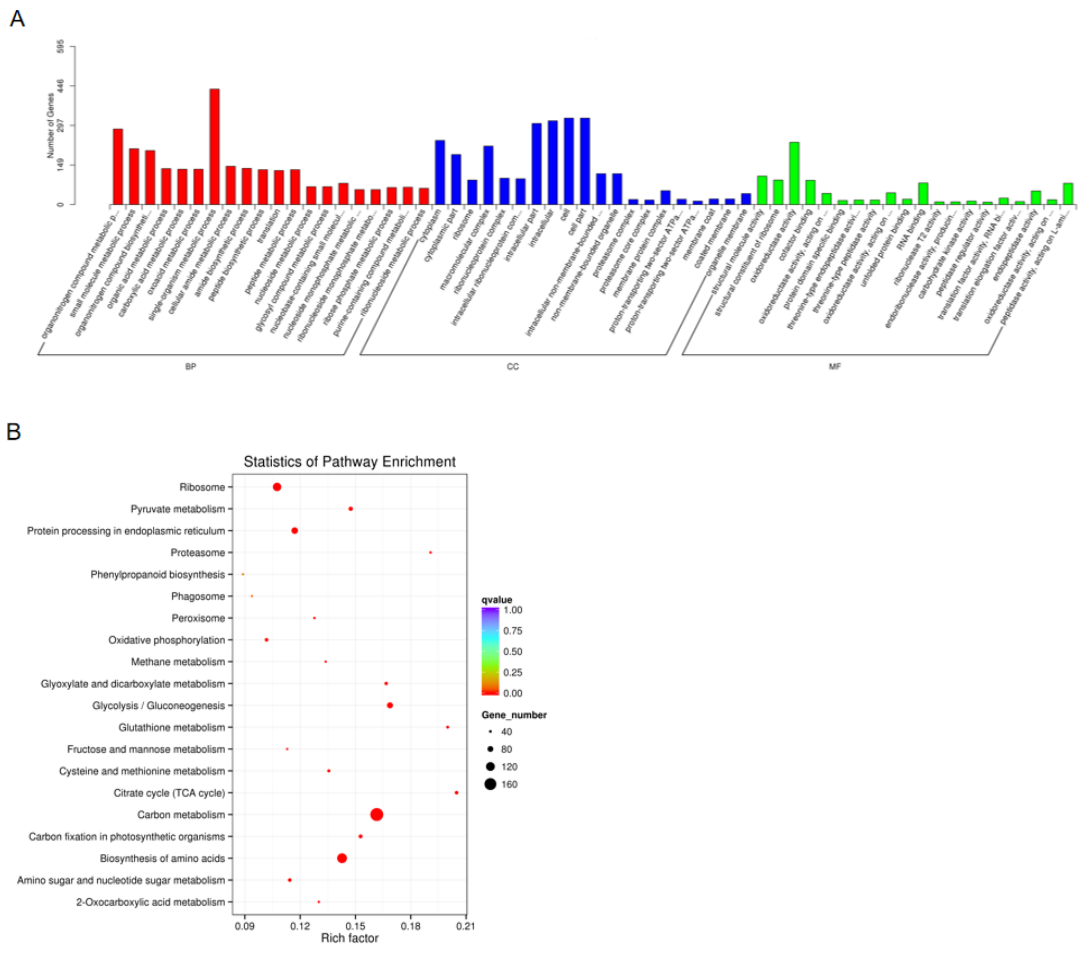

**Figure S1.** GO (A) and KEGG (B) analysis of commonly contained proteins.

**Table S1.** Comparison of sample preparation protocols for ginseng cauline leaf and root.

|              | No. | Lysis buffer    | Depletion method                  | Number of identified proteins |
|--------------|-----|-----------------|-----------------------------------|-------------------------------|
| cauline leaf | 1   | GdnHCl Lysate   | Methanol-chloroform precipitation | 1366                          |
|              | 2   | GdnHCl Lysate   | N/A                               | 1019                          |
|              | 3   | Tris-HCl Lysate | Acetone precipitation             | 529                           |
|              | 4   | Tris-HCl Lysate | N/A                               | 361                           |
| Root         | 5   | GdnHCl Lysate   | N/A                               | 929                           |
|              | 6   | Tris-HCl Lysate | N/A                               | 439                           |

**Table S2.** The top20 of ginseng cauline leaf protein based on the abundance of MS analysis.

| protein name                                                 | Coverage [%] | Peptides | PSMs | Molecular function                                                                                                                                                    | Biological process                                                                                                                                    |
|--------------------------------------------------------------|--------------|----------|------|-----------------------------------------------------------------------------------------------------------------------------------------------------------------------|-------------------------------------------------------------------------------------------------------------------------------------------------------|
| Ribulose biphosphate carboxylase large chain                 | 33           | 16       | 81   | Catalysis of the reaction: D-ribulose-1,5-biphosphate + CO <sub>2</sub> + H <sub>2</sub> O = 2,3-phospho-D-glycerate                                                  | incorporate carbon into organic compounds                                                                                                             |
| Ribulose biphosphate carboxylase large chain (Fragment)      | 29           | 11       | 48   | Catalysis of the reaction: D-ribulose-1,5-biphosphate + CO <sub>2</sub> + H <sub>2</sub> O = 2,3-phospho-D-glycerate                                                  | incorporate carbon into organic compounds                                                                                                             |
| Ribonuclease-like storage protein                            | 58           | 10       | 42   | Interacting selectively and non-covalently with RNA molecule; Catalysis of the two-stage endonucleolytic cleavage                                                     |                                                                                                                                                       |
| ATP synthase subunit β, chloroplastic                        | 43           | 16       | 34   | Interacting selectively and non-covalently with ATP, ADP + H <sub>2</sub> O + phosphate + H <sup>+</sup> (in) = ATP + H <sup>+</sup> (out), by a rotational mechanism | result in the formation of ATP;The directed movement of a proton across a membrane                                                                    |
| ATP synthase subunit β, chloroplastic                        | 55           | 15       | 34   | Interacting selectively and non-covalently with ATP                                                                                                                   | result in the formation of ATP;The directed movement of a proton across a membrane                                                                    |
| Catalase                                                     | 24           | 19       | 34   | Catalysis of the reaction: 2 hydrogen peroxide = O <sub>2</sub> + 2 H <sub>2</sub> O                                                                                  | Any process that results in a change in state or activity of a cell or an organism; A metabolic process that results in electrons transfer            |
| Ribulose biphosphate carboxylase/oxygenase activase 1        | 36           | 15       | 33   | Interacting selectively and non-covalently with ATP                                                                                                                   |                                                                                                                                                       |
| ATP synthase subunit β, mitochondrial                        | 42           | 17       | 31   | Interacting selectively and non-covalently with ATP; ADP + H <sub>2</sub> O + phosphate + H <sup>+</sup> (in) = ATP + H <sup>+</sup> (out), by a rotational mechanism | result in the formation of ATP;The directed movement of a proton across a membrane                                                                    |
| ATP synthase subunit β, mitochondrial                        | 43           | 17       | 30   | Interacting selectively and non-covalently with ATP; ADP + H <sub>2</sub> O + phosphate + H <sup>+</sup> (in) = ATP + H <sup>+</sup> (out), by a rotational mechanism | result in the formation of ATP;The directed movement of a proton across a membrane                                                                    |
| Glyceraldehyde-3-phosphate dehydrogenase GAPB, chloroplastic | 25           | 14       | 30   | Interacting selectively and non-covalently with nicotinamide adenine dinucleotide; Catalysis of an oxidation-reduction (redox) reaction                               | The chemical reactions and pathways involving glucose; A metabolic process that results in electrons transfer                                         |
| Glyceraldehyde-3-phosphate dehydrogenase A, chloroplastic    | 30           | 13       | 29   | Interacting selectively and non-covalently with nicotinamide adenine dinucleotide; Catalysis of an oxidation-reduction (redox) reaction                               | The chemical reactions and pathways involving glucose; A metabolic process that results in electrons transfer                                         |
| Glyceraldehyde-3-phosphate dehydrogenase A, chloroplastic    | 31           | 13       | 29   | Interacting selectively and non-covalently with nicotinamide adenine dinucleotide; Catalysis of an oxidation-reduction (redox) reaction                               | The chemical reactions and pathways involving glucose; A metabolic process that results in electrons transfer                                         |
| Catalase isozyme 2                                           | 34           | 15       | 28   | Catalysis of the reaction: 2 hydrogen peroxide = O <sub>2</sub> + 2 H <sub>2</sub> O                                                                                  | Any process that results in a change in state or activity of a cell or an organism; A metabolic process that results in electrons transfer            |
| Glycine dehydrogenase (decarboxylating) 1, mitochondrial     | 29           | 20       | 27   | Catalysis of the reaction: glycine + lipoylprotein = S-aminomethylidihydrolypoylprotein + CO <sub>2</sub>                                                             | The chemical reactions and pathways resulting in the breakdown of glycine, aminoethanoic acid; A metabolic process that results in electrons transfer |
| Heat shock cognate 70 kDa protein                            | 25           | 16       | 26   |                                                                                                                                                                       |                                                                                                                                                       |
| ATP-dependent Clp protease                                   |              |          |      |                                                                                                                                                                       |                                                                                                                                                       |
| ATP-binding subunit ClpA homolog CD4B, chloroplastic         | 26           | 21       | 25   | Interacting selectively and non-covalently with ATP, and any protein or protein complex                                                                               | The chemical reactions and pathways involving a protein, includes protein modification.                                                               |
| Glyceraldehyde-3-phosphate dehydrogenase B, chloroplastic    | 29           | 9        | 23   | Catalysis of an oxidation-reduction (redox) reaction                                                                                                                  | A metabolic process that results in electrons transfer                                                                                                |
| Serine hydroxymethyltransferase 1, mitochondrial             | 46           | 19       | 23   | Catalysis of the reaction: 5,10-methylenetetrahydrofolate + glycine + H <sub>2</sub> O = tetrahydrofolate + L-serine                                                  | one-carbon (C1) units are transferred between tetrahydrofolate molecules, to synthesise other tetrahydrofolate molecules                              |
| Chaperonin 60 subunit β 2, chloroplastic                     | 37           | 19       | 22   | Interacting selectively and non-covalently with ATP                                                                                                                   | restores the biological activity of an unfolded or misfolded protein.                                                                                 |
| Serine hydroxymethyltransferase, mitochondrial               | 46           | 19       | 22   | Catalysis of the reaction: 5,10-methylenetetrahydrofolate + glycine + H <sub>2</sub> O = tetrahydrofolate + L-serine                                                  | one-carbon (C1) units are transferred between tetrahydrofolate molecules, to synthesise other tetrahydrofolate molecules                              |

**Table S3.** The top20 ginseng root proteins based on the abundance by MS analysis.

| protein name                                                                                         | Coverage [%] | Peptides | PSMs | Molecular function                                                                                                                                                                                         | Biological process                                                                                                     |
|------------------------------------------------------------------------------------------------------|--------------|----------|------|------------------------------------------------------------------------------------------------------------------------------------------------------------------------------------------------------------|------------------------------------------------------------------------------------------------------------------------|
| Ribonuclease-like storage protein                                                                    | 61           | 22       | 178  | Interacting selectively and non-covalently with RNA molecule;<br>Catalysis of the two-stage endonucleolytic cleavage                                                                                       |                                                                                                                        |
| Ribonuclease-like storage protein                                                                    | 63           | 23       | 167  | Interacting selectively and non-covalently with RNA molecule;<br>Catalysis of the two-stage endonucleolytic cleavage                                                                                       |                                                                                                                        |
| Ribonuclease-like storage protein                                                                    | 76           | 19       | 166  | Interacting selectively and non-covalently with RNA molecule;<br>Catalysis of the two-stage endonucleolytic cleavage                                                                                       |                                                                                                                        |
| Ribonuclease-like storage protein                                                                    | 58           | 19       | 157  | Interacting selectively and non-covalently with RNA molecule;<br>Catalysis of the two-stage endonucleolytic cleavage                                                                                       |                                                                                                                        |
| $\beta$ -amylase                                                                                     | 27           | 24       | 108  | Catalysis of the reaction: (1,4-alpha-D-glucosyl)(n+1) + H <sub>2</sub> O = (1,4-alpha-D-glucosyl)(n-1) + alpha-maltose                                                                                    | The chemical reactions and pathways resulting in the breakdown of a polysaccharide                                     |
| Heat shock cognate 70 kDa protein                                                                    | 35           | 28       | 53   |                                                                                                                                                                                                            |                                                                                                                        |
| Ribonuclease-like storage protein                                                                    | 60           | 27       | 40   | Interacting selectively and non-covalently with RNA molecule;<br>Catalysis of the two-stage endonucleolytic cleavage                                                                                       |                                                                                                                        |
| Heat shock cognate 70 kDa protein                                                                    | 28           | 19       | 37   |                                                                                                                                                                                                            |                                                                                                                        |
| $\alpha$ -1,4 glucan phosphorylase L-1 isozyme, chloroplastic/amyloplastic                           | 35           | 24       | 35   | Catalysis of the reaction: glycogen + phosphate = maltodextrin + alpha-D-glucose 1-phosphate                                                                                                               | The chemical reactions and pathways involving carbohydrates                                                            |
| Heat shock cognate 70 kDa protein 2 Probable mediator of RNA polymerase II transcription subunit 37c | 26           | 19       | 35   |                                                                                                                                                                                                            |                                                                                                                        |
| 5-methyltetrahydropteroyltriglutamate--homocysteine methyltransferase                                | 28           | 26       | 34   | Catalysis of the reaction:<br>5-methyltetrahydropteroyltri-L-glutamate + L-homocysteine = L-methionine + tetrahydropteroyltri-L-glutamate; Interacting selectively and non-covalently with zinc (Zn) ions. | The chemical reactions and pathways resulting in the formation of methionine                                           |
| 5-methyltetrahydropteroyltriglutamate--homocysteine methyltransferase                                | 28           | 23       | 33   | Catalysis of the reaction:<br>5-methyltetrahydropteroyltri-L-glutamate + L-homocysteine = L-methionine + tetrahydropteroyltri-L-glutamate; Interacting selectively and non-covalently with zinc (Zn) ions. | The chemical reactions and pathways resulting in the formation of methionine                                           |
| ATP synthase subunit $\beta$ , mitochondrial                                                         | 45           | 18       | 32   | Interacting selectively and non-covalently with ATP; ADP + H <sub>2</sub> O + phosphate + H <sup>+</sup> (in) = ATP + H <sup>+</sup> (out), by a rotational mechanism                                      | result in the formation of ATP; The directed movement of a proton across a membrane                                    |
| Enolase 2                                                                                            | 52           | 22       | 32   | Catalysis of the reaction: 2-phospho-D-glycerate = phosphoenolpyruvate + H <sub>2</sub> O; Interacting selectively and non-covalently with any metal ion.                                                  | The chemical reactions and pathways resulting in the breakdown of a carbohydrate into pyruvate                         |
| 1,4-alpha-glucan-branching enzyme                                                                    | 32           | 22       | 31   | Catalysis of the hydrolysis of any O-glycosyl bond                                                                                                                                                         | The chemical reactions and pathways involving carbohydrates, and result in the formation of glycogen                   |
| Enolase 2                                                                                            | 53           | 22       | 31   | Catalysis of the reaction: 2-phospho-D-glycerate = phosphoenolpyruvate + H <sub>2</sub> O; Interacting selectively and non-covalently with any metal ion.                                                  | The chemical reactions and pathways resulting in the breakdown of a carbohydrate into pyruvate                         |
| Fructose-bisphosphate aldolase 6, cytosolic                                                          | 58           | 21       | 31   | Catalysis of the reaction: D-fructose 1,6-bisphosphate = glyceraldehyde 3-phosphate + D-glyceraldehyde-3-phosphate                                                                                         | The chemical reactions and pathways to catalysis glycolysis resulting in the breakdown of a carbohydrate into pyruvate |
| ATP synthase subunit $\beta$ , mitochondrial                                                         | 44           | 18       | 30   | Interacting selectively and non-covalently with ATP; ADP + H <sub>2</sub> O + phosphate + H <sup>+</sup> (in) = ATP + H <sup>+</sup> (out), by a rotational mechanism                                      | result in the formation of ATP; The directed movement of a proton across a membrane                                    |
| Glyceraldehyde-3-phosphate dehydrogenase, cytosolic                                                  | 64           | 14       | 29   | Catalysis of an oxidation-reduction (redox) reaction                                                                                                                                                       | A metabolic process that results in electrons transfer                                                                 |

**Table S4.** The UGTs and CYPs identified from ginseng cauline leaf and root.

| Gene ID | Swissprot description                                                                            | leaf | root |       | Gene ID | Swissprot description                                                                    | leaf | root |       |
|---------|--------------------------------------------------------------------------------------------------|------|------|-------|---------|------------------------------------------------------------------------------------------|------|------|-------|
| PG08475 | 7-deoxygluconate glucosyltransferase OS<br>= periwinkle OX = 4058 GN = UGT709C2<br>PE = 1 SV = 1 | Y    | N    | UGT70 | PG15945 | UDP-glycosyltransferase 76B1 OS =<br>Arabidopsis OX = 3702 GN = UGT76B1<br>PE = 2 SV = 1 | Y    | N    | UGT76 |
| PG36439 | 7-deoxygluconate glucosyltransferase OS<br>= periwinkle OX = 4058 GN = UGT709C2<br>PE = 1 SV = 1 | Y    | N    | UGT70 | PG00517 | Kaempferol 3-O- $\beta$ -D-galactosyltransferase<br>OS = Petunia OX = 4102 PE = 1 SV = 1 | Y    | N    | UGT78 |
| PG23742 | UDP-glycosyltransferase 71E1 OS =                                                                | Y    | N    | UGT71 | PG00083 | UDP-glycosyltransferase 79B30 OS =                                                       | Y    | N    | UGT79 |

|         |                                                                                                                                |   |   |       |         |                                                                                                                                    |   |   |       |
|---------|--------------------------------------------------------------------------------------------------------------------------------|---|---|-------|---------|------------------------------------------------------------------------------------------------------------------------------------|---|---|-------|
|         | Stevia rebaudiana OX = 55670 GN =<br>UGT71E1 PE = 2 SV = 1                                                                     |   |   |       |         | soybean maximum OX = 3847 GN = FG3<br>PE = 1 SV = 2                                                                                |   |   |       |
| PG30324 | UDP-glucoside flavonoid<br>3-O-glucosyltransferase 6 OS = strawberry<br>(Fragariaananassa) OX = 3747 GN = GT6<br>PE = 1 SV = 1 | Y | Y | UGT71 | PG03287 | UDP-glycosyltransferase 84B1 OS =<br>Arabidopsis OX = 3702 GN = UGT84B1<br>PE = 2 SV = 1                                           | Y | N | UGT84 |
| PG34795 | UDP-glucoside flavonoid<br>3-O-glucosyltransferase 6 OS = strawberry<br>(Fragariaananassa) OX = 3747 GN = GT6<br>PE = 1 SV = 1 | Y | Y | UGT71 | PG34278 | Linamarin synthase 1 OS =<br>Manihotesculenta OX = 3983 GN =<br>UGT85K4 PE = 1 SV = 1                                              | Y | N | UGT85 |
| PG05151 | UDP-glucoside flavonoid<br>3-O-glucosyltransferase 6 OS = strawberry<br>(Fragariaananassa) OX = 3747 GN = GT6<br>PE = 1 SV = 1 | N | Y | UGT71 | PG19859 | Linamarin synthase 2 OS =<br>Manihotesculenta OX = 3983 GN =<br>UGT85K5 PE = 1 SV = 1                                              | Y | N | UGT85 |
| PG34796 | UDP-glucoside flavonoid<br>3-O-glucosyltransferase 6 OS = strawberry<br>(Fragariaananassa) OX = 3747 GN = GT6<br>PE = 1 SV = 1 | Y | N | UGT71 | PG18416 | UDP-glycosyltransferase 88A1 OS =<br>Arabidopsis OX = 3702 GN = UGT88A1<br>PE = 2 SV = 1                                           | N | Y | UGT88 |
| PG21124 | Hydroquinone glucosyltransferase OS =<br>Rauwolfiaserpentina OX = 4060 GN = AS<br>PE = 1 SV = 1                                | Y | Y | UGT72 | PG02224 | UDP-glycosyltransferase 89B2 OS =<br>Stevia rebaudiana OX = 55670 GN =<br>UGT89B2 PE = 2 SV = 1                                    | Y | N | UGT89 |
| PG30450 | Hydroquinone glucosyltransferase OS =<br>Rauwolfiaserpentina OX = 4060 GN = AS<br>PE = 1 SV = 1                                | Y | N | UGT72 | PG34647 | UDP-glycosyltransferase 91A1 OS =<br>Arabidopsis OX = 3702 GN = UGT91A1<br>PE = 2 SV = 1                                           | Y | Y | UGT91 |
| PG16259 | East glucosyltransferase OS = Tobacco<br>OX = 4097 GN = TOGT1 PE = 1 SV = 1                                                    | Y | N | UGT73 | PG05454 | UDP-glycosyltransferase 91A1 OS =<br>Arabidopsis OX = 3702 GN = UGT91A1<br>PE = 2 SV = 1                                           | N | Y | UGT91 |
| PG29012 | East glucosyltransferase OS = Tobacco<br>OX = 4097 GN = TOGT1 PE = 1 SV = 1                                                    | Y | N | UGT73 | PG03173 | UDP-glycosyltransferase 91C1 OS =<br>Arabidopsis OX = 3702 GN = UGT91C1<br>PE = 2 SV = 1                                           | Y | N | UGT91 |
| PG14163 | UDP-glycosyltransferase 74F2 OS =<br>Arabidopsis OX = 3702 GN = UGT74F2<br>PE = 1 SV = 1                                       | Y | N | UGT74 | PG13029 | UDP-glycosyltransferase 92A1 OS =<br>Arabidopsis OX = 3702 GN = UGT92A1<br>PE = 2 SV = 1                                           | Y | N | UGT92 |
| PG17964 | UDP-glycosyltransferase 74E2 OS =<br>Arabidopsis OX = 3702 GN = UGT74E2<br>PE = 1 SV = 1                                       | Y | N | UGT74 | PG22997 | $\beta$ -D-glucosylcroctin<br>$\beta$ -1,6-glucosyltransferase OS = scorpion<br>scorpion OX = 114476 GN = UGT94E5<br>PE = 1 SV = 1 | Y | Y | UGT94 |
| PG31437 | UDP-glycosyltransferase 74E2 OS =<br>Arabidopsis OX = 3702 GN = UGT74E2<br>PE = 1 SV = 1                                       | Y | N | UGT74 | PG35394 | $\beta$ -D-glucosylcroctin<br>$\beta$ -1,6-glucosyltransferase OS = scorpion<br>scorpion OX = 114476 GN = UGT94E5<br>PE = 1 SV = 1 | Y | N | UGT94 |
| PG30551 | UDP-glycosyltransferase 74E2 OS =<br>Arabidopsis OX = 3702 GN = UGT74E2<br>PE = 1 SV = 1                                       | Y | Y | UGT74 | PG11440 | $\beta$ -D-glucosylcroctin<br>$\beta$ -1,6-glucosyltransferase OS = scorpion<br>scorpion OX = 114476 GN = UGT94E5                  | Y | N | UGT94 |

|         |                                                                                                          |   |   |           |         |                                                                                                            |   |   |          |
|---------|----------------------------------------------------------------------------------------------------------|---|---|-----------|---------|------------------------------------------------------------------------------------------------------------|---|---|----------|
|         |                                                                                                          |   |   |           |         | PE = 1 SV = 1                                                                                              |   |   |          |
| PG14160 | UDP-glycosyltransferase 74E1 OS = Arabidopsis OX = 3702 GN = UGT74E1<br>PE = 3 SV = 1                    | Y | N | UGT74     | PG07945 | Protein HOTHREAD OS = Arabidopsis OX = 3702 GN = HTH PE = 1 SV = 1                                         | Y | N | UGT??    |
| PG34073 | Croctetin glucosyltransferase, chloroplast OS = scorpion scorpion OX = 114476 GN = UGT75L6 PE = 1 SV = 1 | Y | N | UGT75     | PG23330 | Linoleic acid 13S-lipoxygenase 2-1, chloroplast OS = Solanum tuberosum OX = 4113 GN = LOX2.1 PE = 1 SV = 1 | Y | N | UGT??    |
| PG05721 | Cytochrome P450 704B1 OS=Arabidopsis thaliana OX=3702 GN=CYP704B1 PE=1 SV=1                              | Y | N | CYP704B1  | PG09699 | Geraniol 8-hydroxylase OS=Catharanthusroseus OX=4058 GN=CYP76B6 PE=1 SV=1                                  | Y | N | CYP76B6  |
| PG25870 | Cytochrome P450 704B1 OS=Arabidopsis thaliana OX=3702 GN=CYP704B1 PE=1 SV=1                              | Y | Y | CYP704B1  | PG01467 | Geraniol 8-hydroxylase OS=Catharanthusroseus OX=4058 GN=CYP76B6 PE=1 SV=1                                  | Y | Y | CYP76B6  |
| PG10057 | Cytochrome P450 704C1 OS=Pinustaeda OX=3352 GN=CYP704C1 PE=2 SV=1                                        | Y | N | CYP704C1  | PG30778 | Cytochrome P450 81E8 OS=Medicago truncatula OX=3880 GN=CYP81E8 PE=2 SV=1                                   | Y | N | CYP81E8  |
| PG40294 | Cytochrome P450 71A8 OS=Menthapiperita OX=34256 GN=CYP71A8 PE=3 SV=1                                     | Y | N | CYP71A8   | PG29120 | Cytochrome P450 82A3 OS=Glycine max OX=3847 GN=CYP82A3 PE=2 SV=1                                           | Y | N | CYP82A3  |
| PG16874 | Cytochrome P450 CYP71D312 OS=Panax ginseng OX=4054 PE=2 SV=1                                             | Y | N | CYP71D312 | PG11378 | Cytochrome P450 82A3 OS=Glycine max OX=3847 GN=CYP82A3 PE=2 SV=1                                           | N | Y | CYP82A3  |
| PG21495 | Cytochrome P450 CYP71D313 OS=Panax ginseng OX=4054 PE=2 SV=1                                             | Y | N | CYP71D313 | PG32345 | Cytochrome P450 82C4 OS=Arabidopsis thaliana OX=3702 GN=CYP82C4 PE=2 SV=1                                  | Y | N | CYP82C4  |
| PG26653 | Cytochrome P450 CYP71D313 OS=Panax ginseng OX=4054 PE=2 SV=1                                             | Y | N | CYP71D313 | PG23797 | Cytochrome P450 CYP82D47 OS=Panax ginseng OX=4054 PE=2 SV=1                                                | Y | N | CYP82D47 |
| PG32259 | Cytochrome P450 CYP71D313 OS=Panax ginseng OX=4054 PE=2 SV=1                                             | Y | N | CYP71D313 | PG29513 | Cytochrome P450 CYP82D47 OS=Panax ginseng OX=4054 PE=2 SV=1                                                | Y | Y | CYP82D47 |
| PG04084 | Cytochrome P450 71D8 OS=Glycine max OX=3847 GN=CYP71D8 PE=2 SV=1                                         | N | Y | CYP71D8   | PG02439 | Cytochrome P450 83B1 OS=Arabidopsis thaliana OX=3702 GN=CYP83B1 PE=1 SV=1                                  | Y | N | CYP83B1  |
| PG01300 | Cytochrome P450 CYP72A219 OS=Panax ginseng OX=4054 PE=2 SV=1                                             | Y | N | CYP72A219 | PG34334 | Cytochrome P450 83B1 OS=Arabidopsis thaliana OX=3702 GN=CYP83B1 PE=1 SV=1                                  | Y | N | CYP83B1  |
| PG40963 | Cytochrome P450 CYP72A219 OS=Panax ginseng OX=4054 PE=2 SV=1                                             | Y | N | CYP72A219 | PG34924 | Cytochrome P450 89A9 OS=Arabidopsis thaliana OX=3702 GN=CYP89A9 PE=2 SV=1                                  | Y | N | CYP89A9  |
| PG03240 | Cytochrome P450 CYP72A219 OS=Panax ginseng OX=4054 PE=2 SV=1                                             | Y | N | CYP72A219 | PG27129 | Cytochrome P450 94A1 OS=Vicia sativa OX=3908 GN=CYP94A1 PE=2 SV=2                                          | Y | N | CYP94A1  |
| PG23478 | Cytochrome P450 CYP72A219 OS=Panax ginseng OX=4054 PE=2 SV=1                                             | Y | N | CYP72A219 | PG23358 | Cytochrome P450 94A2 OS=Vicia sativa OX=3908 GN=CYP94A2 PE=2 SV=1                                          | Y | N | CYP94A2  |
| PG09274 | Cytochrome P450 CYP72A219 OS=Panax ginseng OX=4054 PE=2 SV=1                                             | N | Y | CYP72A219 | PG27467 | Cytochrome P450 94A2 OS=Vicia sativa OX=3908 GN=CYP94A2 PE=2 SV=1                                          | Y | N | CYP94A2  |
| PG28769 | Trans-cinnamate 4-monoxygenase                                                                           | Y | Y | CYP73A1   | PG16781 | Cytochrome P450 97B2, chloroplastic                                                                        | Y | N | CYP97B2  |

|         |                                                                 |   |   |           |         |                                                                                                          |   |   |         |
|---------|-----------------------------------------------------------------|---|---|-----------|---------|----------------------------------------------------------------------------------------------------------|---|---|---------|
|         | OS=Helianthus tuberosus OX=4233<br>GN=CYP73A1 PE=1 SV=1         |   |   |           |         | OS=Glycine max OX=3847<br>GN=CYP97B2 PE=2 SV=1                                                           |   |   |         |
| PG13617 | Cytochrome P450 CYP736A12 OS=Panax<br>ginseng OX=4054 PE=2 SV=1 | Y | N | CYP736A12 | PG35257 | Carotene epsilon-monooxygenase,<br>chloroplastic OS=Arabidopsis thaliana<br>OX=3702 GN=CYP97C1 PE=1 SV=1 | Y | N | CYP97C1 |
| PG33495 | Cytochrome P450 CYP736A12 OS=Panax<br>ginseng OX=4054 PE=2 SV=1 | Y | N | CYP736A12 | PG24387 | Cytochrome P450 98A2 OS=Glycine max<br>OX=3847 GN=CYP98A2 PE=2 SV=1                                      | Y | N | CYP98A2 |
| PG36905 | Cytochrome P450 CYP736A12 OS=Panax<br>ginseng OX=4054 PE=2 SV=1 | Y | N | CYP736A12 | PG41871 | Cytochrome P450 98A2 OS=Glycine max<br>OX=3847 GN=CYP98A2 PE=2 SV=1                                      | Y | Y | CYP98A2 |

**Table S5.** Proteins involved in ginsenoside biosynthesis.

| Protein (Gene ID)   | Biosynthetic pathway | Swissprot description                                                                                                          | Cauline leaf | Root |
|---------------------|----------------------|--------------------------------------------------------------------------------------------------------------------------------|--------------|------|
| AACT(PG11912)       | MVA                  | Probable acetyl-CoA acetyltransferase, cytosolic 2<br>OS=Arabidopsis thaliana OX=3702 GN=At5g47720 PE=2 SV=1                   | Y            | Y    |
| HMGS (PG38955)      | MVA                  | Hydroxymethylglutaryl-CoA synthase OS=Arabidopsis thaliana<br>OX=3702 GN=HMGS PE=1 SV=2                                        | N            | Y    |
| MVK(PG20228)        | MVA                  | Mevalonate kinase OS=Arabidopsis thaliana OX=3702<br>GN=At5g27450 PE=2 SV=1                                                    | N            | Y    |
| PMK(PG25943)        | MVA                  | Phosphomevalonate kinase, peroxisomal OS=Arabidopsis<br>thaliana OX=3702 GN=PMK PE=1 SV=1                                      | Y            | N    |
| MVD1(PG37213)       | MVA                  | Diphosphomevalonate decarboxylase MVD2, peroxisomal<br>OS=Arabidopsis thaliana OX=3702 GN=MVD2 PE=1 SV=1                       | Y            | Y    |
| MVD2(PG02263)       | MVA                  | Diphosphomevalonate decarboxylase MVD2, peroxisomal<br>OS=Arabidopsis thaliana OX=3702 GN=MVD2 PE=1 SV=1                       | N            | Y    |
| IDI1(PG19600)       | MVA                  | Isopentenyl-diphosphate Delta-isomerase I<br>OS=Camptothecaacuminata OX=16922 GN=IPI1 PE=2 SV=1                                | Y            | Y    |
| IDI2(PG03104)       | MVA                  | Isopentenyl-diphosphate Delta-isomerase II<br>OS=Camptothecaacuminata OX=16922 GN=IPI2 PE=2 SV=1                               | Y            | N    |
| FPS(PG34283)        |                      | Farnesyl pyrophosphate synthase OS=Artemisia annua<br>OX=35608 GN=FPS1 PE=2 SV=1                                               | Y            | Y    |
| PPDS(PG37358)       |                      | Dammarenydiol 12-hydroxylase OS=Panax ginseng OX=4054<br>GN=PPDS PE=1 SV=2                                                     | Y            | Y    |
| PPTS(PG26599)       |                      | Protopanaxadiol 6-hydroxylase OS=Panax ginseng OX=4054<br>PE=1 SV=1                                                            | Y            | Y    |
| CAS(PG03815)        |                      | Cycloartenol Synthase OS=Panax ginseng OX=4054<br>GN=OSCPNX1 PE=1 SV=1                                                         | Y            | N    |
| DXS(PG31496)        | MEP                  | Protease 2 OS=Escherichia coli (strain K12) OX=83333<br>GN=ptrB PE=1 SV=2                                                      | N            | Y    |
| DXR1(PG36148)       | MEP                  | 1-deoxy-D-xylulose 5-phosphate reductoisomerase, chloroplastic<br>OS=Oryza sativa subsp. japonica OX=39947 GN=DXR PE=2<br>SV=2 | Y            | Y    |
| DXR2(PG34876)       | MEP                  | 1-deoxy-D-xylulose 5-phosphate reductoisomerase, chloroplastic<br>OS=Oryza sativa subsp. japonica OX=39947 GN=DXR PE=2<br>SV=2 | Y            | Y    |
| IspE(PG20660)       | MEP                  | 4-diphosphocytidyl-2-C-methyl-D-erythritol kinase,<br>chloroplastic OS=Menthapiperita OX=34256 GN=ISPE PE=1<br>SV=1            | N            | Y    |
| IspF(PG27983)       | MEP                  | 2-C-methyl-D-erythritol 2,4-cyclodiphosphate synthase,<br>chloroplastic OS=Catharanthusroseus OX=4058 GN=ISPF PE=2<br>SV=1     | Y            | Y    |
| IspG/gcpE1(PG25816) | MEP                  | 4-hydroxy-3-methyl-2-lbutenyl diphosphate synthase                                                                             | Y            | N    |

---

|                     |     |                                                                                                                                         |   |   |
|---------------------|-----|-----------------------------------------------------------------------------------------------------------------------------------------|---|---|
|                     |     | (ferredoxin), chloroplastic OS=Arabidopsis thaliana OX=3702<br>GN=ISPG PE=1 SV=1<br>4-hydroxy-3-methy-2-lbutenyl diphosphate synthase   |   |   |
| IspG/gcpE2(PG34415) | MEP | (ferredoxin), chloroplastic OS=Arabidopsis thaliana OX=3702<br>GN=ISPG PE=1 SV=1<br>4-hydroxy-3-methy-2-lbutenyl diphosphate reductase, | Y | Y |
| IspH(PG19130)       | MEP | chloroplastic OS=Oryza sativa subsp. japonica OX=39947<br>GN=ISPH PE=2 SV=1                                                             | Y | N |

---
